# Supplementary material
Source: PubMed Central journal article supplement (PMC5450019)
Supplement: se7b00210_si_001.pdf [file se7b00210_si_001.pdf]

## Supporting Information

# Peptide-mediated nanopore detection of uranyl ions in aqueous media

Golbarg M Roozbahani<sup>1</sup>, Xiaohan Chen<sup>1</sup>, Youwen Zhang<sup>1</sup>, Ruiqi Xie<sup>1</sup>, Rui Ma<sup>1</sup>, Dien Li<sup>2</sup>, Huazhong Li<sup>3</sup>, and Xiyun Guan<sup>1,\*</sup>

<sup>1</sup>Department of Chemistry, Illinois Institute of Technology, 3101 S Dearborn St, Chicago, IL 60616, USA

<sup>2</sup>Environmental Sciences and Biotechnology, Savannah River National Laboratory, Aiken, SC 29808, USA

<sup>3</sup>Henan Jintai Biological Technology Co., Ltd., ZhengZhou, Henan, PR China

### Table of Contents:

|                                                                                                                                  |    |
|----------------------------------------------------------------------------------------------------------------------------------|----|
| <b>Table S1.</b> Effect of buffer solution on peptide translocation in the nanopore .....                                        | S2 |
| <b>Table S2.</b> The net charges of peptide HH <sub>14</sub> at different pH values .....                                        | S3 |
| <b>Figure S1.</b> Schematic illustration of the uranyl nanopore sensor.....                                                      | S4 |
| <b>Figure S2.</b> Typical single-channel recording trace segment of uranyl.....                                                  | S5 |
| <b>Figure S3.</b> I-V Curves of peptide HH <sub>14</sub> , UO <sub>2</sub> <sup>2+</sup> , and their mixtures in the nanopore... | S6 |
| <b>Figure S4.</b> Dose response curve for peptide HH <sub>14</sub> .....                                                         | S7 |
| <b>Figure S5.</b> Dose-response curve for uranyl in asymmetric electrolyte conditions .....                                      | S8 |
| <b>Figure S6.</b> Voltage effect on the sensitivity of the nanopore uranyl sensor .....                                          | S9 |

**Table S1.** Effect of buffer solution on peptide translocation in the nanopore. The experiments were performed at +80 mV with the (M113F)<sub>7</sub>  $\alpha$ HL protein nanopore in electrolyte solutions with different pH values and different buffer components. The concentration of peptide HH<sub>14</sub> was 10  $\mu$ M.

| Buffer components                | Buffer pH | Event counts / min |
|----------------------------------|-----------|--------------------|
| 1 M NaCl, 10 mM sodium phosphate | 4.5       | 6.0                |
|                                  | 5.5       | 6.7                |
| 1 M NaCl, 10 mM sodium acetate   | 4.5       | 3.4                |
|                                  | 5.5       | 5.0                |
| 1 M NaCl, 10 mM sodium citrate   | 4.5       | 2.1                |
|                                  | 5.5       | 2.6                |
| 1 M NaCl, 10 mM Tris             | 6.5       | 42.5               |
|                                  | 7.5       | 61.7               |

**Table S2.** The net charges\* of peptide HH<sub>14</sub> at different pH values.

| pH  | Histidine | Lysine | Tyrosine | Peptide HH <sub>14</sub> |
|-----|-----------|--------|----------|--------------------------|
| 7.5 | 0.01      | 0.98   | -0.03    | 1.05                     |
| 6.5 | 0.25      | 1.00   | 0.00     | 4.05                     |
| 5.5 | 0.78      | 1.00   | 0.00     | 10.31                    |
| 4.5 | 0.97      | 1.00   | 0.01     | 12.69                    |

\*The net charge of peptide HH<sub>14</sub> (sequence: HHHHHHKHHHYHHH) at each pH value was determined by amino acid composition, i.e., the sum of the net charges of all the amino acids in the peptide. The net charge ( $Z$ ) of an amino acid was estimated by using the equation:

$$Z = \sum_i N_i \frac{10^{pK_{ai}}}{10^{pH} + 10^{pK_{ai}}} - \sum_j N_j \frac{10^{pH}}{10^{pH} + 10^{pK_{aj}}}$$

Where the  $pK_a$  values pertain to the N-terminus and the side chains of lysine and histidine, and the  $j$ -index belongs to the C-terminus and tyrosine amino acid.

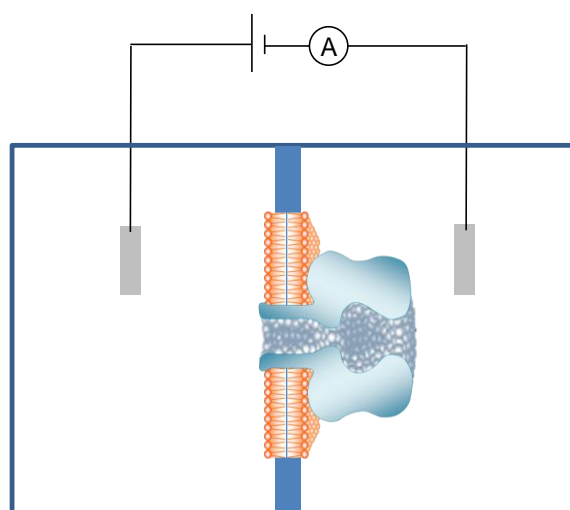

**Figure S1.** Schematic illustration of the uranyl nanopore sensor.

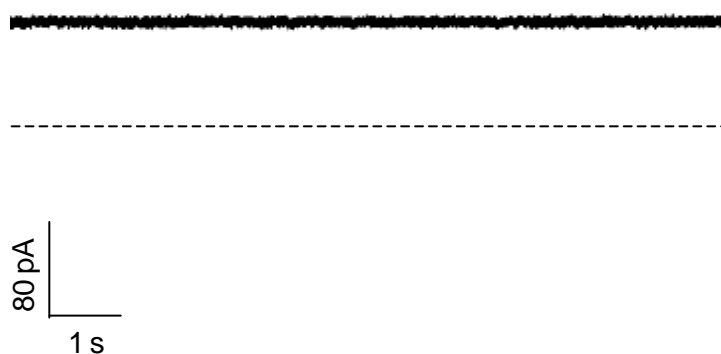

**Figure S2.** Typical single-channel recording trace segment, showing that uranyl ions didn't produce any current blockage events in the nanopore. The experiment was performed at +100 mV with the (M113F)<sub>7</sub>  $\alpha$ HL protein pore in an electrolyte solution comprising 1.0 M NaCl and 10 mM Tris•HCl (pH 6.5) and in the presence of 10  $\mu$ M uranyl ions. The dashed line represents the level of zero current.

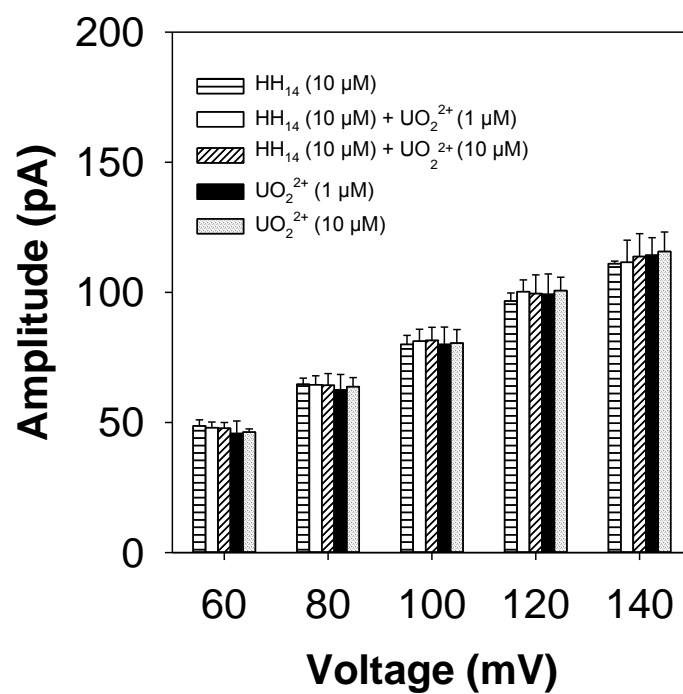

**Figure S3.** I-V Curves of peptide HH<sub>14</sub>, UO<sub>2</sub><sup>2+</sup>, and their mixtures in the nanopore. The experiments were performed with the (M113F)<sub>7</sub> αHL protein pore in an electrolyte solution comprising 1.0 M NaCl and 10 mM Tris•HCl (pH 6.5).

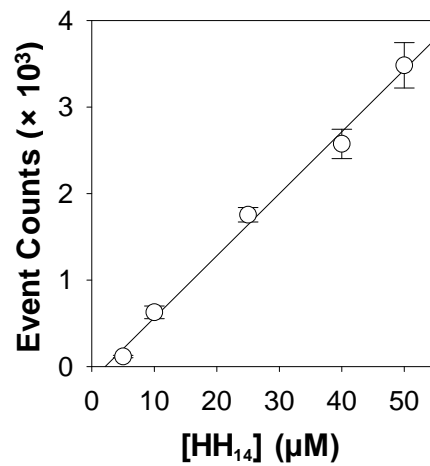

**Figure S4.** Dose response curve for peptide HH<sub>14</sub>. The experiments were performed at +100 mV with the (M113F)<sub>7</sub> αHL protein pore in an electrolyte solution containing 1 M NaCl and 10 mM Tris (pH 6.5). Event counts were calculated based on 10-min single channel recording trace segments.

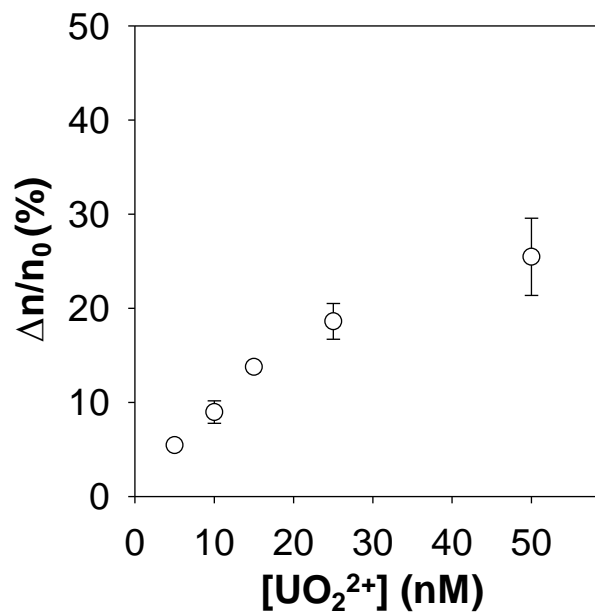

**Figure S5.** Dose-response curve for uranyl in asymmetric electrolyte conditions (3 M NaCl and 10 mM Tris•HCl (pH 6.5) (*cis*) / 0.5 M NaCl and 10 mM Tris•HCl (pH 6.5) (*trans*)). The experiments were performed at +100 mV with the (M113F)<sub>7</sub> αHL nanopore in the presence of 10 μM peptide HH<sub>14</sub>, which was added to the *trans* compartment of the nanopore sensing chamber. The change (Δn) in the number of peptide HH<sub>14</sub> events after addition of UO<sub>2</sub><sup>2+</sup> to the solution was calculated by using the equation: Δn = n<sub>0</sub> - n<sub>1</sub>, where n<sub>0</sub> represented the number of HH<sub>14</sub> events in the absence of uranyl, while n<sub>1</sub> depicted the number of peptide HH<sub>14</sub> events in the presence of UO<sub>2</sub><sup>2+</sup>.



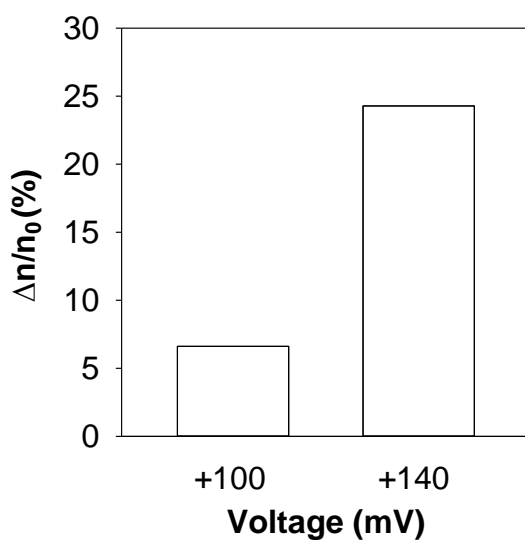

**Figure S6.** Voltage effect on the sensitivity of the nanopore uranyl sensor. The experiments were performed with the (M113F)<sub>7</sub>  $\alpha$ HL nanopore in the presence of 10  $\mu$ M peptide HH<sub>14</sub> and 5 nM UO<sub>2</sub><sup>2+</sup> under a salt gradient condition of 3 M NaCl and 10 mM Tris•HCl (pH 6.5) (*cis*) / 0.5 M NaCl and 10 mM Tris•HCl (pH 6.5) (*trans*). The change ( $\Delta n$ ) in the number of peptide HH<sub>14</sub> events after addition of UO<sub>2</sub><sup>2+</sup> to the solution was calculated by using the equation:  $\Delta n = n_0 - n_1$ , where  $n_0$  represented the number of HH<sub>14</sub> events in the absence of uranyl, while  $n_1$  depicted the number of peptide HH<sub>14</sub> events in the presence of UO<sub>2</sub><sup>2+</sup>.
